# Supplementary material
Source: publisher figshare collection journal article supplement (https://asha.figshare.com/articles/dataset/_/9454127)
Supplement: Supplementary file 1 [file 1]

**Supplemental Material S2. Implementation fidelity checklists.**

| Baseline Sessions                                                                                                                                       | Not Observed (N/A) | Completed |
|---------------------------------------------------------------------------------------------------------------------------------------------------------|--------------------|-----------|
| One of three therapy activities is chosen: reading a story, free play, or craft activities. (Content)                                                   |                    |           |
| Clinician engages in two therapy activities with student with DLD for 30-min session. (Content)                                                         |                    |           |
| Clinician provides verbal recasts and opportunities for language production.                                                                            |                    |           |
| Clinician elicits production of first targeted grammar feature (e.g., “Let’s talk about the pictures in this story” or “Let’s talk about what we do.”). |                    |           |
| Clinician elicits production of second targeted grammar feature (e.g., “Tell me what happened.”).                                                       |                    |           |
| Clinician thanks student for telling them about the therapy activity.                                                                                   |                    |           |

| Intervention Sessions                                                                                                                             | Not Observed (N/A) | Completed |
|---------------------------------------------------------------------------------------------------------------------------------------------------|--------------------|-----------|
| <b>First Grammar Activity Implementation</b><br><br>Indicate type of intervention: <input type="checkbox"/> Visual <input type="checkbox"/> Motor |                    |           |
| One of three therapy activities is chosen: reading a story, free play, or creating a craft. (Content)                                             |                    |           |

|                                                                                                                                                    |  |  |
|----------------------------------------------------------------------------------------------------------------------------------------------------|--|--|
| Clinician explains use of grammatical structure.                                                                                                   |  |  |
| Clinician demonstrates and prompts student to produce grammatical structure in a demonstration sentence.                                           |  |  |
| Clinician’s method of production corresponds exclusively to targeted intervention method (e.g., verbal and visual, verbal and movement). (Content) |  |  |
| Clinician reminds student to use grammatical structure, (e.g., “While we play, remember to use all the parts of your words.”).                     |  |  |
| Clinician models production for target grammatical morphemes in appropriate intervention mode throughout chosen therapy activity.                  |  |  |
| Clinician elicits production of target grammatical morphemes throughout chosen therapy activity.                                                   |  |  |
| Clinician responds to inclusion of target structure with specific praise and expansion, reinforcing the target structure.                          |  |  |
| Clinician responds to omission of target structure by recasting with correct production in indirect question form (e.g., “You mean X?”).           |  |  |

|                                                                                                                                                                           |  |  |
|---------------------------------------------------------------------------------------------------------------------------------------------------------------------------|--|--|
| Clinician encourages student to repeat utterances with target structure.                                                                                                  |  |  |
| At least 10 opportunities to produce target grammatical morphemes are provided within a 15-min session.<br>(Content)                                                      |  |  |
| Clinician thanks student for using target structure while they completed therapy activity (e.g., “Thank you for using good word endings while we made our craft today.”). |  |  |
| <b>Second Grammar Activity Implementation</b><br><br>Indicate type of intervention: <input type="checkbox"/> Visual <input type="checkbox"/> Motor                        |  |  |
| One of three therapy activities is chosen: reading a story, free play, or creating a craft. (Content)                                                                     |  |  |
| Clinician explains use of grammatical structure.                                                                                                                          |  |  |
| Clinician demonstrates and prompts student to produce grammatical structure in a demonstration sentence.                                                                  |  |  |
| Clinician’s method of production corresponds exclusively to targeted intervention method, e.g. verbal and visual, verbal and movement. (Content)                          |  |  |
| Clinician reminds student to use grammatical structure, (e.g., “While we play, remember to use all the parts of your words.”).                                            |  |  |

|                                                                                                                                                                           |  |  |
|---------------------------------------------------------------------------------------------------------------------------------------------------------------------------|--|--|
| Clinician models production for target grammatical morphemes in appropriate intervention mode throughout chosen therapy activity.                                         |  |  |
| Clinician elicits production of target grammatical morphemes throughout chosen therapy activity.                                                                          |  |  |
| Clinician responds to inclusion of target structure with specific praise and expansion, reinforcing the target structure.                                                 |  |  |
| Clinician responds to omission of target structure by recasting with correct production in indirect question form (e.g., “You mean X?”).                                  |  |  |
| Clinician encourages student to repeat utterances with target structure.                                                                                                  |  |  |
| At least 10 opportunities to produce target grammatical morphemes are provided within a 15-min session.<br>(Content)                                                      |  |  |
| Clinician thanks student for using target structure while they completed therapy activity (e.g., “Thank you for using good word endings while we made our craft today.”). |  |  |
