# Supplementary material
Source: publisher figshare collection journal article supplement (https://asha.figshare.com/articles/dataset/_/9454127)
Supplement: Supplementary file 2 [file 1]

### **Supplemental Material S1. Research questions.**

The specific research questions to be addressed were:

1. What impact did language interventions using systematic visual supports or systematic gesture supports have on the use of grammatical structures by children with developmental language disorders (DLD)?
2. Did the rate of learning of grammatical structures by children with DLD differ between language interventions using visual supports or systematic gesture supports?
3. Did the intervention mode impact the generalization and/or maintenance in use of the bound grammatical structure by children with DLD?
4. Did the clinicians using the systematic visual supports or systematic gestural supports find these intervention strategies for learning bound grammatical structures useful and effective?
